# Supplementary material for: Sex Hormones Regulate SHANK Expression
Source: PubMed Central journal article supplement (PMC6167484; doi:10.3389/fnmol.2018.00337), 2018-09-25
Supplement: Data_Sheet_1.pdf [file Data_Sheet_1.pdf]

## *Supplementary Material*

### **Sex hormones regulate *SHANK* gene expression**

**Simone Berkel<sup>1\*</sup>, Ahmed Eltokhi<sup>1,2\*</sup>, Henning Fröhlich<sup>1</sup>, Diana Porras Gonzalez<sup>1</sup>, Rafiullah Rafiullah<sup>1</sup>, Rolf Sprengel<sup>2</sup>, Gudrun A. Rappold<sup>1</sup>**

\* Authors contributed equally to this work

**Correspondence:** Prof. Dr. Gudrun Rappold: [Gudrun.Rappold@med.uni-heidelberg.de](mailto:Gudrun.Rappold@med.uni-heidelberg.de)

## Supplementary Figures and Tables

### 1. Supplementary Figures

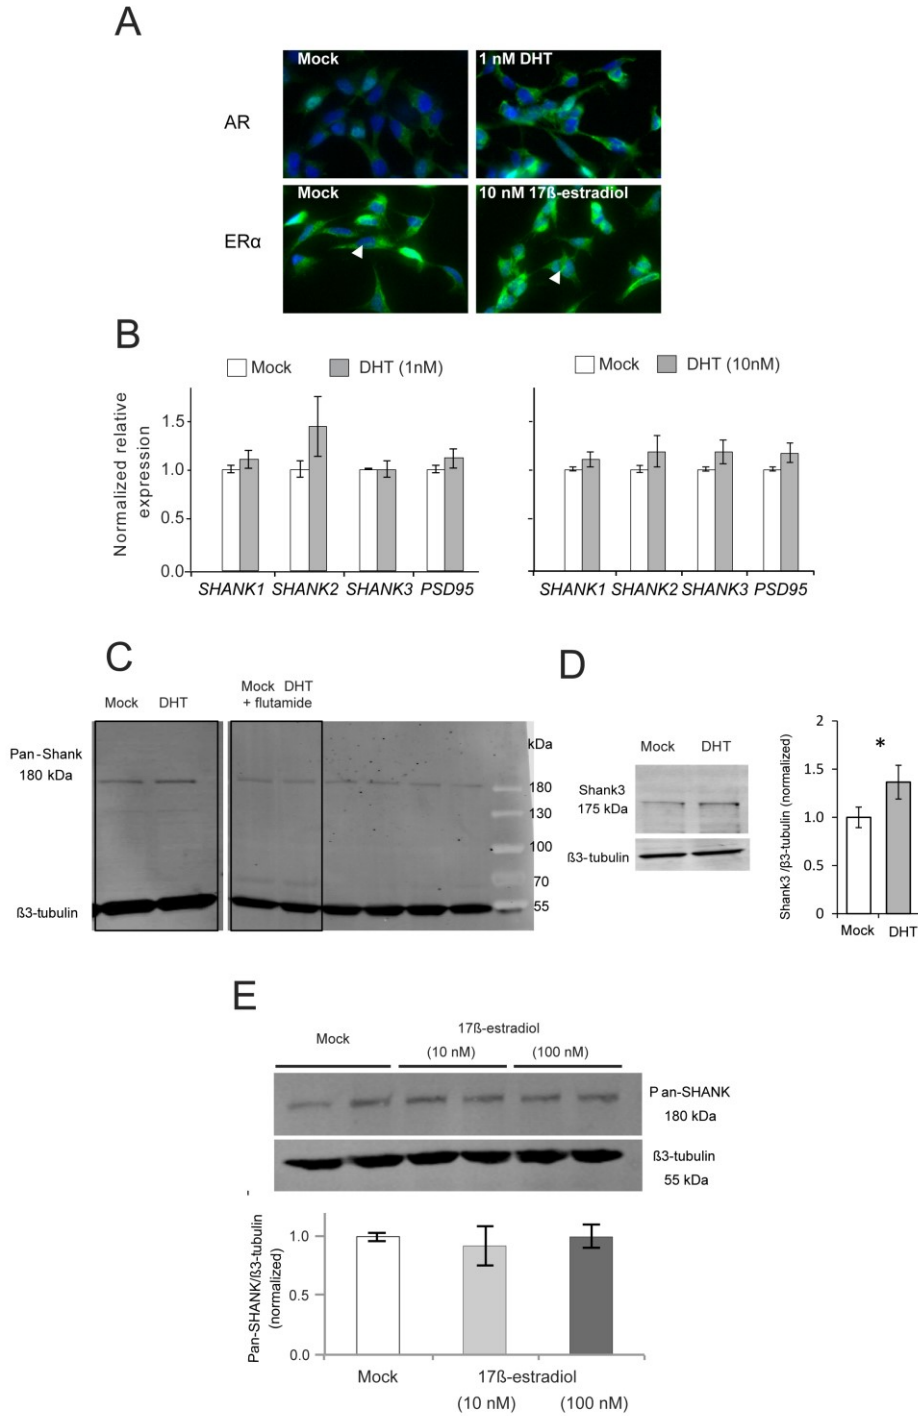

**Supplementary Figure S1. Effect of DHT and 17 $\beta$ -estradiol treatments in SH-SY5Y cells**

(A) Immunofluorescence staining showing the effect of 1 nM DHT and 10 nM 17 $\beta$ -estradiol treatments for 2 hr in SH-SY5Y cells on AR and ER $\alpha$  expression, respectively. The expression of AR was increased after the DHT treatment. The expression of ER $\alpha$  was localized in the nucleus after the 17 $\beta$ -estradiol treatment without an increase in the overall expression. (B) Gene expression analysis of *SHANK1-3* after 4 hrs of treatment with 1 nM DHT (n= 3 experiments with 6 biological replicates for each condition), and 10 nM DHT (n= 4 experiments with 6 biological replicates for each condition) (2-way ANOVA, versus mock). *PSD95* was used as a positive control. Gene expression was normalized against *18S*. (C) Full western blot pictures showing a band with a size of 180 kDa using Pan-Shank and a band with a size of 55 kDa using  $\beta$ 3-tubulin. The marked frames indicate the corresponding bands in Figure 1B. (D) An increase of Shank3 protein level by 40% was identified after 48 hours of 100 nM DHT treatment (n= 3, unpaired two-tailed Student's t-tests, \*  $P \leq 0.05$ ) by western blot analysis. (E) Western blot analysis did not show any significant effect of 17 $\beta$ -estradiol treatment on SHANK protein expression in SH-SY5Y cells (10 nM, 100 nM 17 $\beta$ -estradiol, n= 3 per treatment group). Error bars indicate SEM.

A

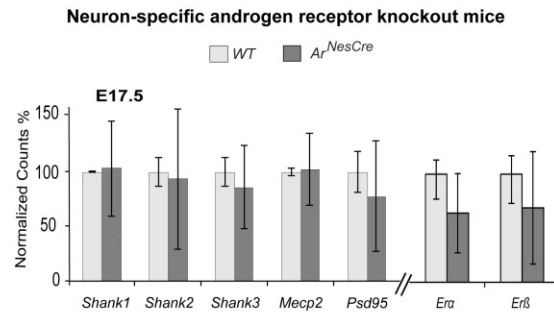

B

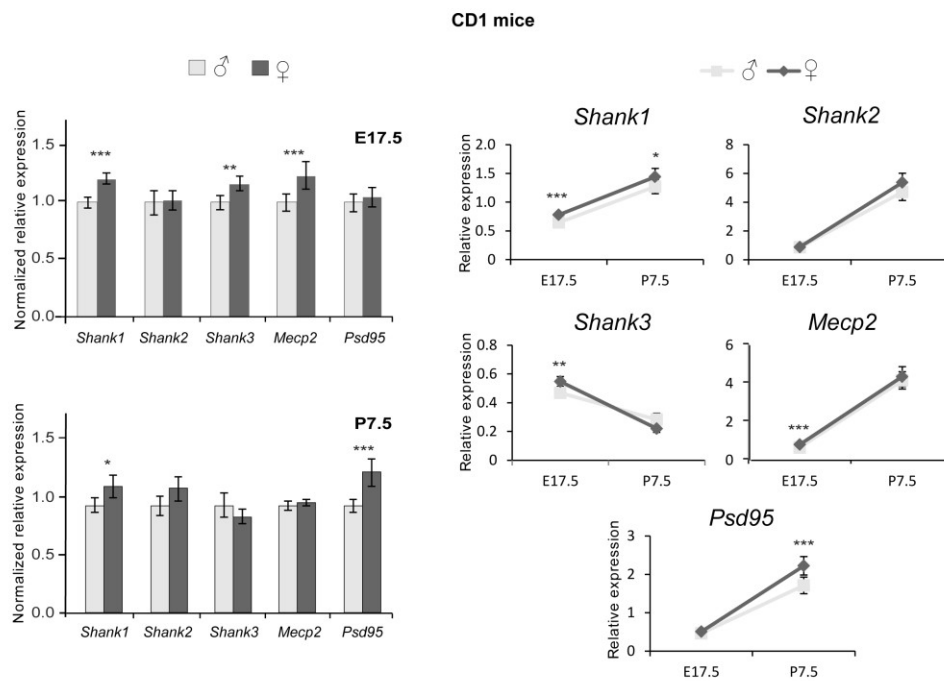

### Supplementary Figure S2. *Shank* gene expression analysis in the male and female mouse cortex

(A) Gene expression analysis in the cortex of wild-type (C57Bl/6N) and neuron-specific androgen receptor knock-out mice at E17.5 (n= 6 *WT* and 6 *Ar<sup>NesCre</sup>* mice, 3 male and 3 female animals in each group). The expression analyses were normalized against *Gapdh*, *Hprt1*, *Hspd1* and *Sdha*. Error bars indicate SEM. (B) qPCR analysis revealed gene expression differences in the male and female mouse cortex at E17.5 for *Shank1* ( $P=0.001$ ), *Shank3* ( $P= 0.007$ ) and *Mecp2* ( $P=0.0005$ ) (n= 16 male,16 female). At developmental stage P7.5, a sex-differential expression was obtained for *Psd95* ( $P= 0.001$ ) and *Shank1* ( $P= 0.03$ ) (n=18 male, 17 female). *Shank1*, *Shank2*, *Mecp2* and *Psd95* expression

increased in the cortex from E17.5 to P7.5. For *Shank3*, expression decreased at P7.5 in both male and female mice. The respective gene expression was normalized against five reference genes (*I8s*, *Gapdh*, *Hprt1*, *Hspd1* and *Sdha*). Error bars indicate SEM (2-way ANOVA, \*  $P \leq 0.05$ , \*\*  $P \leq 0.01$ , \*\*\*  $P \leq 0.001$ ). Bonferroni correction:  $n=5$  tests for each developmental stage,  $P \leq 0.01$ .

## 2. Supplementary Tables

| Amplicon    | Species | Primer Name   | Sequence 5' to 3'           |
|-------------|---------|---------------|-----------------------------|
| 18S         | human   | 18S_F         | GATGGGCGGCGGAAAAATAG        |
|             | human   | 18S_R         | GCGTGGATTCTGCATAATGGT       |
| GAPDH       | human   | GAPDH_F       | CTGGGCTACACTGAGCACC         |
|             | human   | GAPDH_R       | AAGTGGTCGTTGAGGGCAATG       |
| HPRT1       | human   | HPRT1_Ex3-5_F | TGATAGATCCATTCCTATGACTGTAGA |
|             | human   | HPRT1_Ex3-5_R | AAGACATTCTTTCCAGTTAAAGTTGAG |
| HSPD1       | human   | HSPD1_F       | GATGGAGAAGCTCTAAGTACACT     |
|             | human   | HSPD1_R       | GCTGGTTCTTCTATTGTCACCA      |
| SDHA        | human   | SDHA-Ex2-3 F  | TGGGAACAAGAGGGCATCTG        |
|             | human   | SDHA-Ex2-3 R  | CCACCACTGCATCAAATTCATG      |
| SHANK1      | human   | SHANK1_F      | CTCCCTGCGTCCAAATCTA         |
|             | human   | SHANK1_R      | GGCTGCTGCTCGTACTCC          |
| SHANK2      | human   | SHANK2_F      | CTTTGGATTCTGCTTCGAG         |
|             | human   | SHANK2_R      | CATCCACGGACTCCAGGTA         |
| SHANK3      | human   | SHANK3_F      | TTCCACGGACCAAGTCTGTA        |
|             | human   | SHANK3_R      | GTCTTGCAATCGAGGTGCTC        |
| MECP2       | human   | MECP2_F       | GTGGAGTTGATTGCGTACTTCG      |
|             | human   | MECP2_R       | CCCTCTCCAGTTACCGTGAA        |
| PSD95       | human   | PSD95_F       | TCACAACCTCTTATCCAGCA        |
|             | human   | PSD95_R       | CATGGCTGTGGGGTAGTAGTCG      |
| 18s         | mouse   | 18s_F         | CTTAGAGGGACAAGTGCGG         |
|             | mouse   | 18s_R         | ACGCTGAGCCAGTCAGTGTA        |
| Gapdh       | mouse   | Gapdh_F       | ACAGTCCATGCCATCACTGCC       |
|             | mouse   | Gapdh_R       | GCCTGCTTACCACCTTCTTG        |
| Hprt1       | mouse   | Hprt1_F       | TCCTCCTCAGACCGCTTTT         |
|             | mouse   | Hprt1_R       | CCTGGTTCATCATCGCTAATC       |
| Hspd1       | mouse   | Hspd1_F       | AGCTGTTACAATGGGGCCAA        |
|             | mouse   | Hspd1_R       | ATCCCCAGCCTCTTCGTTTG        |
| Sdha        | mouse   | Sdha_F        | CATGCCAGGGAAGATTACAAA       |
|             | mouse   | Sdha_R        | GTTCCCCAAACGGCTTCT          |
| Shank1      | mouse   | mShank1_F     | GTCCTACCAGGCGCAAGGCG        |
|             | mouse   | mShank1_R     | CCCAGAAGCCTCCTCCCCGA        |
| Shank2      | mouse   | mShank2_F     | TGCTGCCAGTGACTGCATTATTGA    |
|             | mouse   | mShank2_R     | CAGGGCTGGAAATGCTGGCGT       |
| Shank3      | mouse   | mShank3_F     | AGGGAACCGTGAAGGGCCGA        |
|             | mouse   | mShank3_R     | TGGCGGAAGAGACGCTTCGT        |
| Mecp2       | mouse   | Mecp2_F       | GCGAGGAGGAGAGACTGGA         |
|             | mouse   | Mecp2_R       | TTCTTGCTTTCTTCGCCTTCT       |
| Psd95       | mouse   | Psd95_F       | CTCTGCGAAGCAACCCCAA         |
|             | mouse   | Psd95_R       | TCTTCGTCGCTGGCGTCAATTA      |
| Ar-knockout | mouse   | mAr_Ex1F      | GCCTCCGAAGTGTGGTATCC        |
|             | mouse   | mAr_Ex2R      | TGGTCCCTGGTACTGTCCAA        |

Supplementary Table S1. qPCR primer list

**A**

|                                   | <i>GAPDH</i> | <i>HPRT1</i> | <i>HSPD1</i> | <i>SDHA</i> |
|-----------------------------------|--------------|--------------|--------------|-------------|
| DHT versus Mock                   | 0.202        | 0.335        | 0.316        | 0.194       |
| 17 $\beta$ -estradiol versus Mock | 0.097        | 0.032        | 0.229        | 0.64        |

**B**

|       | <i>Gapdh</i> | <i>Hprt1</i> | <i>Hspd1</i> | <i>Sdha</i> |
|-------|--------------|--------------|--------------|-------------|
| E17.5 | 0.2055       | 0.8219       | 0.2179       | 0.9228      |
| P7.5  | 0.7953       | 0.1236       | 0.6343       | 0.9668      |

**Supplementary Table S2.** (A) Analysis of the influence of DHT and 17 $\beta$ -estradiol treatment on reference gene expression. 2-way ANOVA *P*-values are shown. The analyzed reference genes were normalized against *18S*. As *HPRT1* and *GAPDH* expression is influenced by 17 $\beta$ -estradiol they were excluded from 17 $\beta$ -estradiol treatment analysis. (B) Quantification of the relative reference gene expression during different developmental stages. 2-way ANOVA *P*-values are shown. The analyzed reference genes were normalized against *18S*.

| Gene          | Reference      | Probe | Sequence                                                                             |
|---------------|----------------|-------|--------------------------------------------------------------------------------------|
| <i>Gapdh</i>  | NM_008084.2    | A     | ATGGGCTTCCCCTTGATGACAAGCTTCCCATTCTCCCTCAAGACCTAAGCGACAGCGTGACCTTGTTC                 |
| <i>Hspd1</i>  | NM_010477.4    | A     | CACAGTTCTCCCTTTGGCCCCATTGTAACAGCTACAGCATCTGCTAAAACATCCTCTTTTCTGGTGTGAGAAGATGCTC      |
| <i>Sdha</i>   | NM_023281.1    | A     | GTAATCATACTCATCGACCCGCACTTTGTAATCTCCCTGGCATGGGCTCCACAATTCTGCGGGTTAGCAGGAAGGTTAGGGAAC |
| <i>Hprt1</i>  | NM_013556.2    | A     | AACAAATCTAGGTCATAAAGCTGTTTCATCATCGCTAATCACGACGCTGGGCTGTTGAGATTATTGAGCTTTCATGACCAGAAG |
| <i>Shank1</i> | NM_001034115.1 | A     | TCACCGCCATGAAGGAGCGACCGGTACCGCTGAATAGAGCTTCTACGCTTTTCGGGTTATATCTATCATTTACTTGACACCCT  |
| <i>Shank2</i> | NM_001113373.2 | A     | TCCACGGACTCCAGGTAAGTGCAGGGCTGGAATGCTGGCGTGGGTGTGAACAACAGCCACTTTTTTCCAAATTTGCAAGAGCC  |
| <i>Shank3</i> | NM_021423.3    | A     | CTTCGTCGGTCTCTCTGGTTTCATGCCGGGTGTACTACTGTCGACCCGTGTGGACGGCACTCAGAGATAACGCATAT        |
| <i>Mecp2</i>  | NM_010788.2    | A     | TGAACACCTTCTGATGCTGCTGCCTTTGGTCTCCAGCCCTGGAGTTTATGTATTGCCAACGAGTTTGTCTTT             |
| <i>Psd95</i>  | NM_007864.3    | A     | GGCCTGGCTCAAGAAACCGCAGTCTTGGTCTTGTCTGTAGTCAAACAACTGGAGAGAGAAGTGAAGACGATTTAACCCA      |
| <i>Gapdh</i>  | NM_008084.2    | B     | CGAAAGCCATGACCTCCGATCACTCATTGATGTTAGTGGGGTCTCGCTCCTGGAAGATGGTG                       |
| <i>Hspd1</i>  | NM_010477.4    | B     | CGAAAGCCATGACCTCCGATCACTCGTGACCCCATCTTTGTTACTTTGGGACTTCCCAACTCTGTTCAATAAT            |
| <i>Sdha</i>   | NM_023281.1    | B     | CGAAAGCCATGACCTCCGATCACTCCAGTGTCCCAACCGGCTTCTTCTGCTGTCCCTGGATGGGCTTGA                |
| <i>Hprt1</i>  | NM_013556.2    | B     | CGAAAGCCATGACCTCCGATCACTCGAGGAATAAACACTTTTTCCAAATCCTCGGCATAATGATTAGGTATACAA          |
| <i>Shank1</i> | NM_001034115.1 | B     | CGAAAGCCATGACCTCCGATCACTCCTTACTCAGAGAGATCTCCCCCTCGCCTTGCCTGGTAGGACT                  |
| <i>Shank2</i> | NM_001113373.2 | B     | CGAAAGCCATGACCTCCGATCACTCTCCTTAGTCCGGCTTGCATGCCACCCACCTTCA                           |
| <i>Shank3</i> | NM_021423.3    | B     | CGAAAGCCATGACCTCCGATCACTCTGTGAAGTGAGGCTGTATAGGAACCCACAGTGTAGTGGCGGAAGAGACG           |
| <i>Mecp2</i>  | NM_010788.2    | B     | CGAAAGCCATGACCTCCGATCACTCGCATCTTGACAACAAGTTTCCAGGGCTCTTCTCCAGGACCTTTTACC             |
| <i>Psd95</i>  | NM_007864.3    | B     | CGAAAGCCATGACCTCCGATCACTCTCGTCTGGCGTCAATTACATGAAGCACATCCCCAAAGTGAAGGCTCAG            |

Supplementary Table S3. Sequences of nCounter probes



A

## E17.5

|                            | <i>Shank1</i> | <i>Shank2</i> | <i>Shank3</i> | <i>Mecp2</i> | <i>Psd95</i> | <i>Er1</i> | <i>Er2</i> |
|----------------------------|---------------|---------------|---------------|--------------|--------------|------------|------------|
| <i>Ar<sup>NesCre</sup></i> | 8603.28       | 6229.19       | 3063.5        | 7610.81      | 8292.52      | 69.29      | 21         |
| <i>Ar<sup>NesCre</sup></i> | 13563.62      | 13754.34      | 6497.94       | 9647.11      | 8232.2       | 181.85     | 204.03     |
| <i>Ar<sup>NesCre</sup></i> | 10418.49      | 8838.58       | 4255.37       | 7923.42      | 8046.16      | 81.55      | 27.18      |
| <i>Ar<sup>NesCre</sup></i> | 13151.12      | 10579.61      | 4759.03       | 10295.95     | 8428.01      | 95.38      | 29.73      |
| <i>Ar<sup>NesCre</sup></i> | 10687.8       | 9545.96       | 4751.24       | 7662.37      | 6781.45      | 114.31     | 39.76      |
| <i>Ar<sup>NesCre</sup></i> | 9986.85       | 7382.68       | 3603.65       | 8458.63      | 6499.23      | 65.93      | 46.15      |
| <i>WT</i>                  | 8775.44       | 6416.94       | 3037.36       | 7670.72      | 11552.21     | 65.91      | 17.24      |
| <i>WT</i>                  | 9226.51       | 6759.56       | 3549.41       | 7624.8       | 11862.07     | 61.03      | 25.34      |
| <i>WT</i>                  | 14223.92      | 15218.76      | 7452.94       | 9202.64      | 8330.83      | 186.82     | 77.46      |
| <i>WT</i>                  | 9674.97       | 10139.29      | 4234.38       | 8282.01      | 5506.2       | 196.83     | 75.7       |
| <i>WT</i>                  | 10873.61      | 10038.17      | 4932.57       | 8344.05      | 7805.6       | 102.01     | 33.57      |
| <i>WT</i>                  | 11488.75      | 11479.26      | 5227.45       | 9323.51      | 5544.52      | 147.69     | 42         |

B

## P7.5

|                            | <i>Shank1</i> | <i>Shank2</i> | <i>Shank3</i> | <i>Mecp2</i> | <i>Psd95</i> | <i>Er1</i> | <i>Er2</i> |
|----------------------------|---------------|---------------|---------------|--------------|--------------|------------|------------|
| <i>Ar<sup>NesCre</sup></i> | 17869.31      | 13632.48      | 9186.02       | 5526.54      | 24192.58     | 341.08     | 20.43      |
| <i>Ar<sup>NesCre</sup></i> | 16697.62      | 12374.08      | 9071.58       | 5418.45      | 23992.67     | 302.95     | 18.7       |
| <i>Ar<sup>NesCre</sup></i> | 16533.77      | 15153.64      | 9153.78       | 5980.18      | 15199.95     | 559.23     | 33.58      |
| <i>Ar<sup>NesCre</sup></i> | 17674.96      | 15396.63      | 9863.64       | 6567.14      | 15592.19     | 458.86     | 21.31      |
| <i>Ar<sup>NesCre</sup></i> | 18875.45      | 16427.47      | 11079.54      | 6737.62      | 17683.93     | 453.67     | 25.3       |
| <i>Ar<sup>NesCre</sup></i> | 16840.48      | 14850.42      | 8296.77       | 5556.45      | 19396.67     | 459.97     | 24.55      |
| <i>Ar<sup>NesCre</sup></i> | 15215.63      | 12066.9       | 7650.36       | 4717.06      | 23299.25     | 293.27     | 16.9       |
| <i>WT</i>                  | 22330.37      | 21856.25      | 12099.64      | 8397.66      | 15508.04     | 755.28     | 30.32      |
| <i>WT</i>                  | 20013.65      | 24517.29      | 12513.66      | 9298.72      | 13688.52     | 869.76     | 18.21      |
| <i>WT</i>                  | 19589.12      | 18734.03      | 12478.03      | 7104.01      | 16647.28     | 528.06     | 24.07      |
| <i>WT</i>                  | 17820.52      | 15169.95      | 10618.97      | 6534.75      | 17790.36     | 408.02     | 27.78      |
| <i>WT</i>                  | 17757.93      | 16876.46      | 10995.64      | 7277.84      | 13308.28     | 556.21     | 47.16      |
| <i>WT</i>                  | 20073.54      | 18600.38      | 11790.26      | 7720.11      | 17127.21     | 652.67     | 19.89      |
| <i>WT</i>                  | 16649.47      | 13921.2       | 8302.35       | 5428.55      | 22463.43     | 446.98     | 19.99      |

**Supplementary Table S4.** The absolute numbers of gene expression counts from the nCounter. (A) At E17.5 (B) At P7.5.
